# Supplementary material for: Long Noncoding RNA LINC02470 Sponges MicroRNA-143-3p and Enhances SMAD3-Mediated Epithelial-to-Mesenchymal Transition to Promote the Aggressive Properties of Bladder Cancer
Source: MDPI journal article supplement (doi:10.3390/cancers14040968), 2022-02-15
Supplement: s1 [file s1]

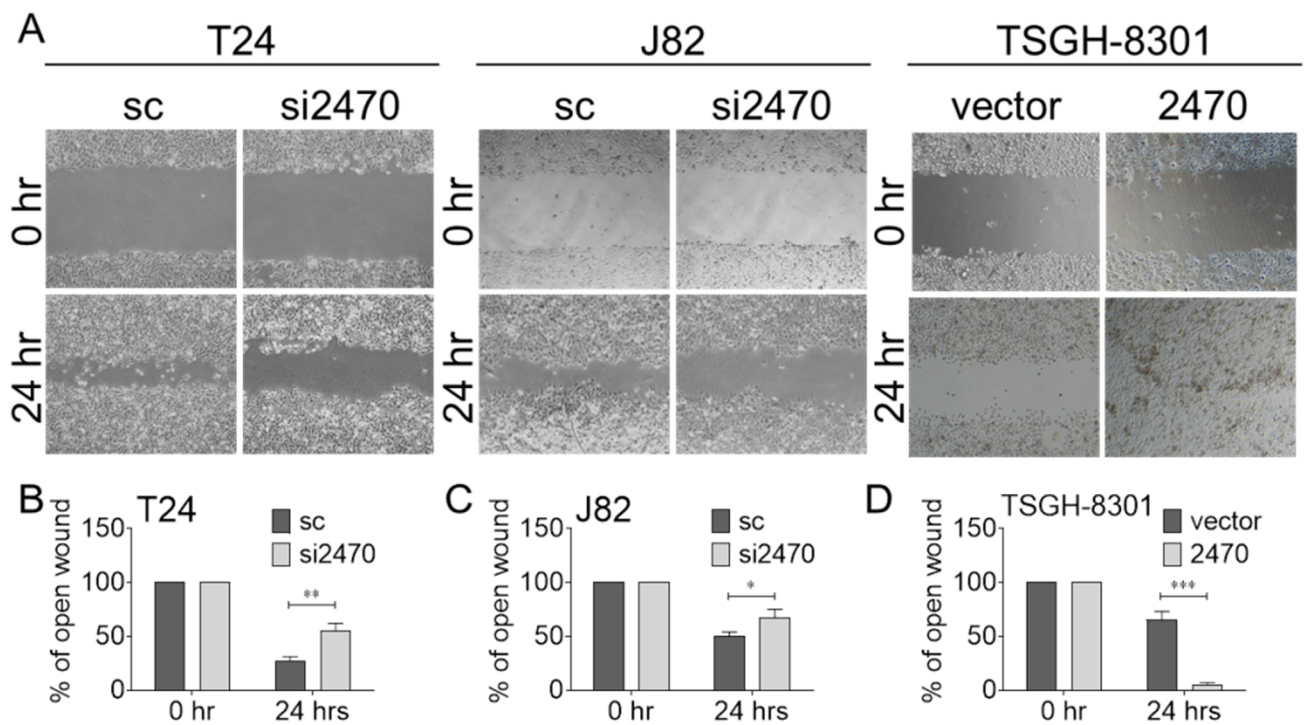

Supplemental Figure S1. (A) The wound-healing assay was used to evaluate LINC02470 effect on cell migration, and T24 and J82 cells transfected with si2470 revealed slower wound-healed ability compared to sc groups. And TSGH-8301 cells transfected with pCMV-LINC02470 (2470) revealed faster wound-healed ability compared to vector group. (B, C, D) The bar-charts were used to show the relative wound area of each group.

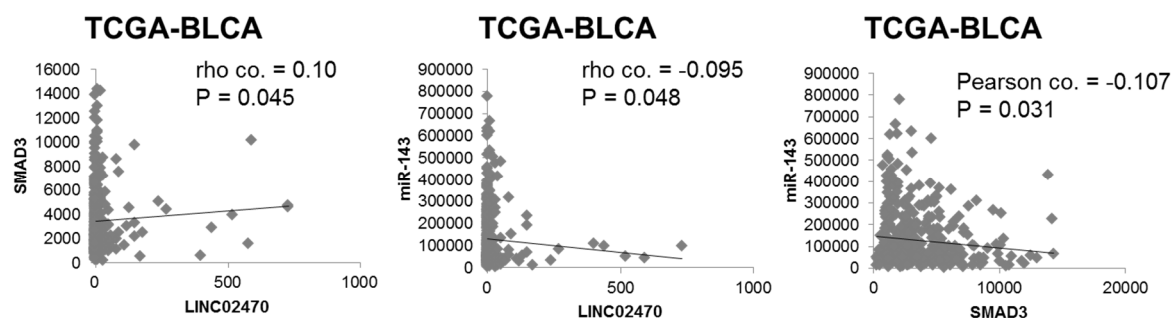

Supplemental Figure S2. The expression of SMAD3 and LINC02470 revealed a positive correlation but the expression of miR-143 was negatively correlated with either LINC02470 or SMAD3 in TCGA-BLCA dataset. The LINC02470 data were collected with discrete percentage and more proper to be analyzed with Spearman rho correlation but miR-143 and SMAD3 were recorded as continuous variables and analyzed with Pearson correlation.

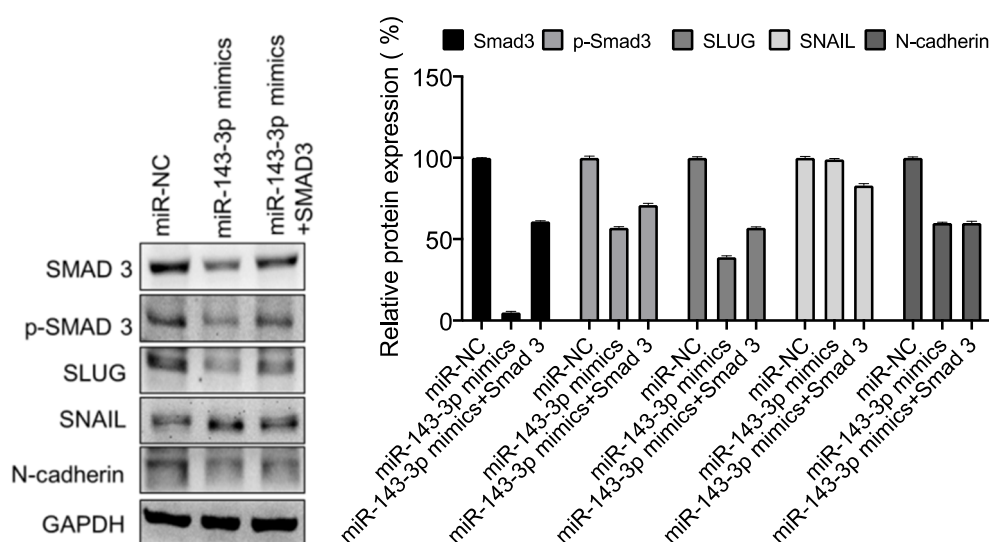

Supplemental Figure S3. The miR143-3p mimics significantly inhibited SMAD3, active phosphorylated SMAD3, SLUG and N-cadherin. And overexpressed SMAD3 rescued the inhibitory effects of miR-143-3p mimics and recovered the expression of SMAD3, active phosphorylated SMAD3, SLUG and N-cadherin. And Bar chart showing the relative protein levels, which were normalized to GAPDH; the miR-NC group was used as the comparative baseline.

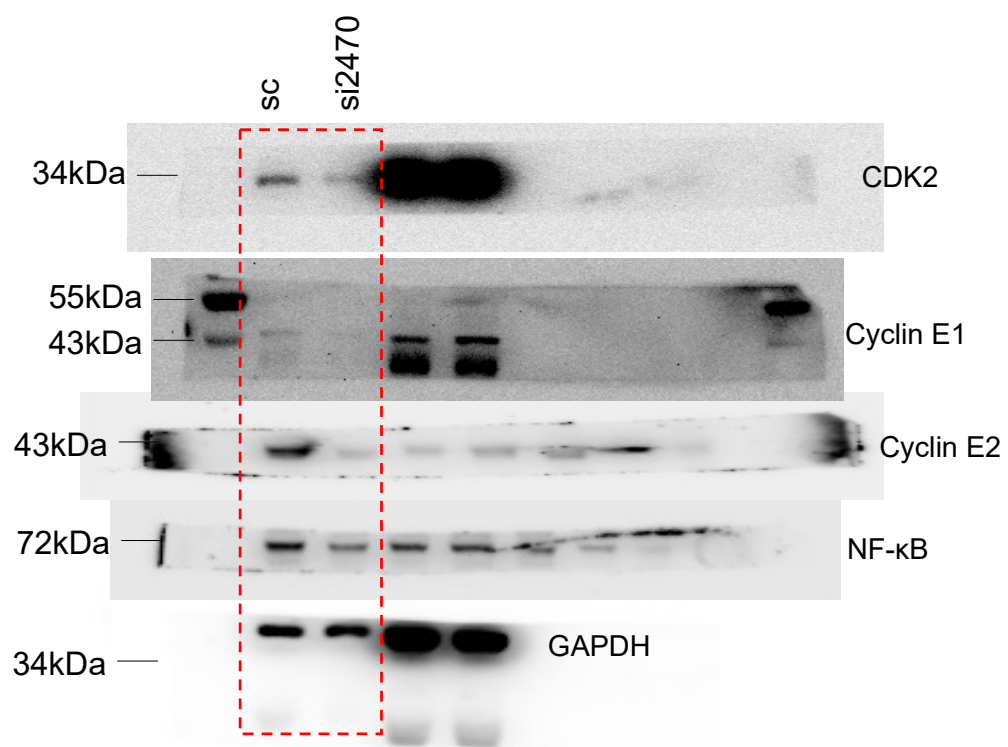

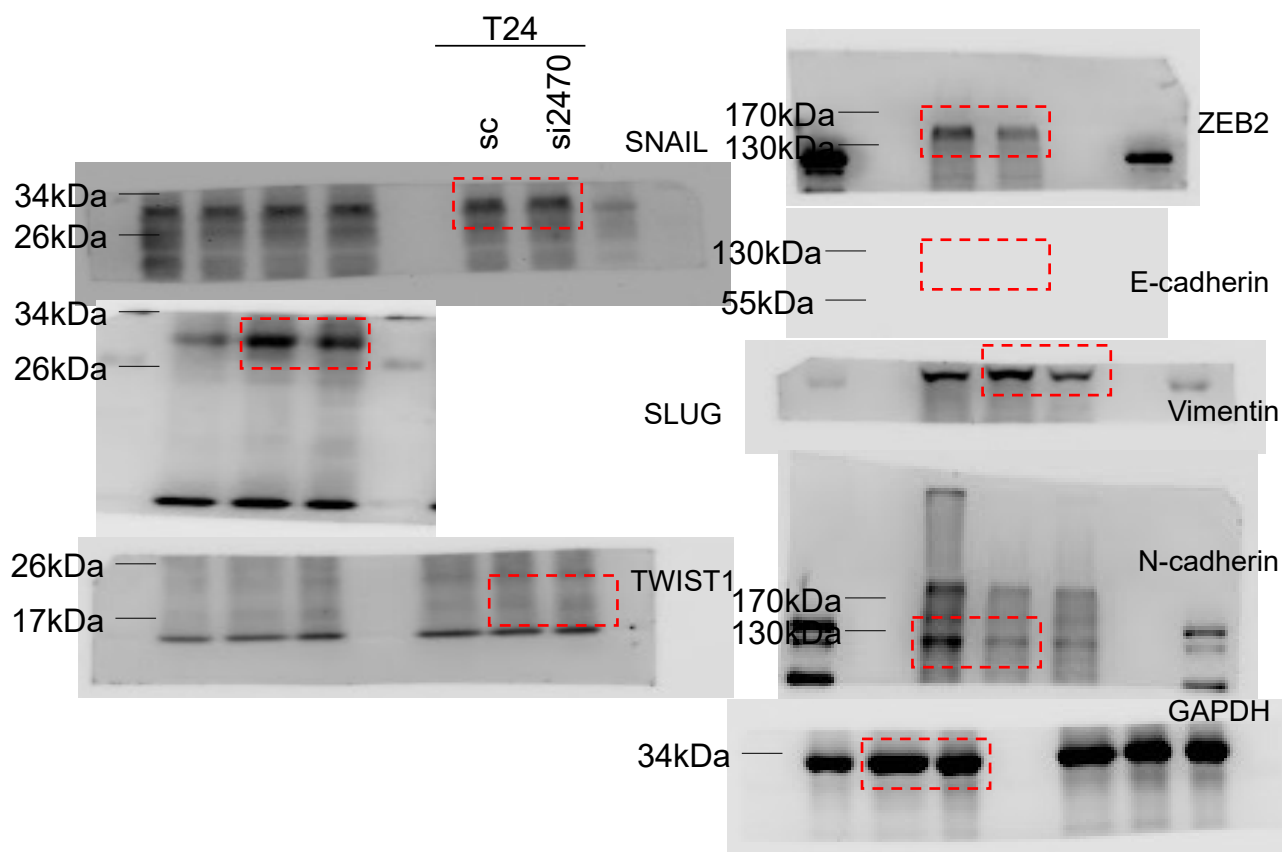

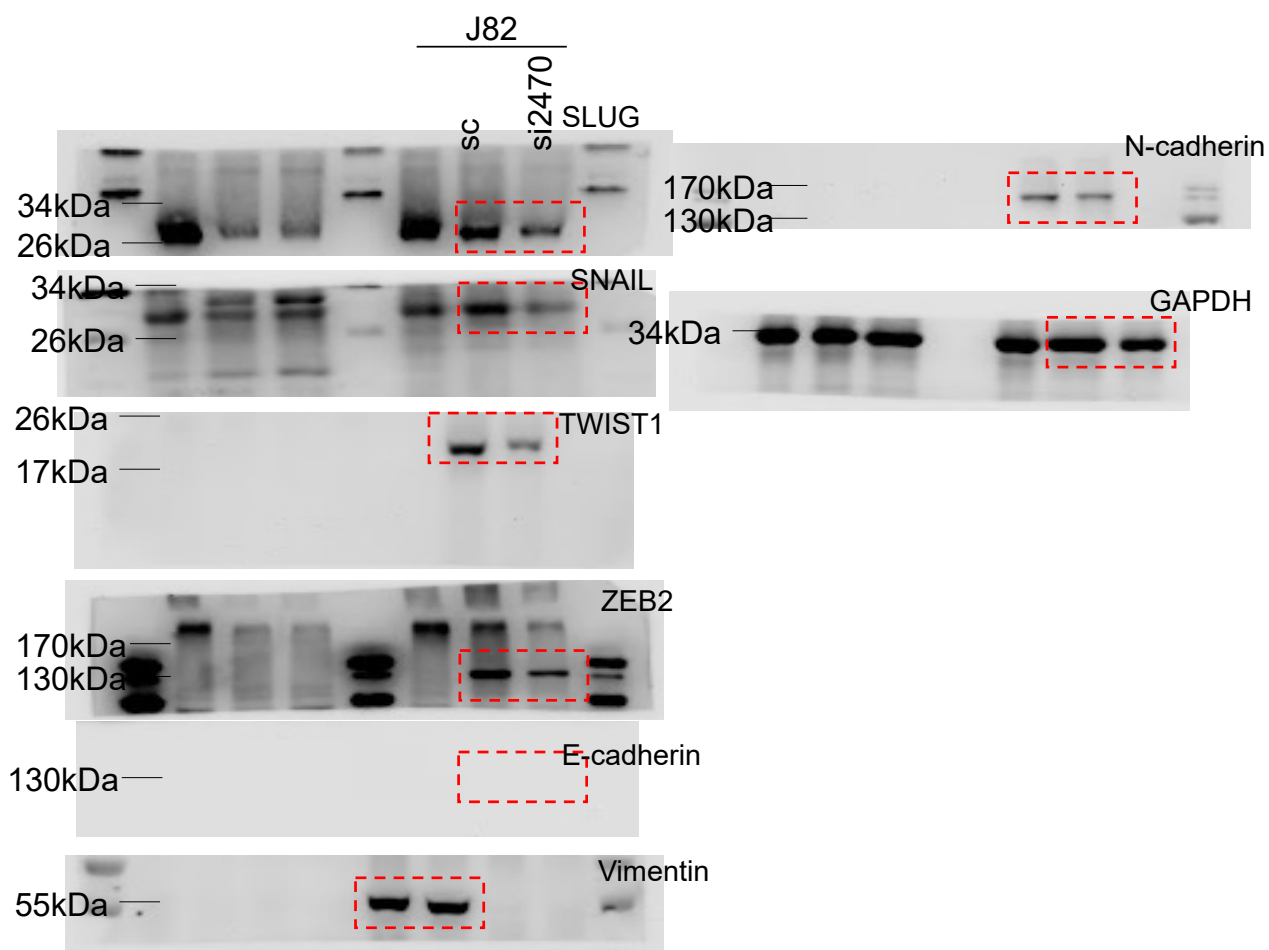

TSGH  
-8301

sc

si2470

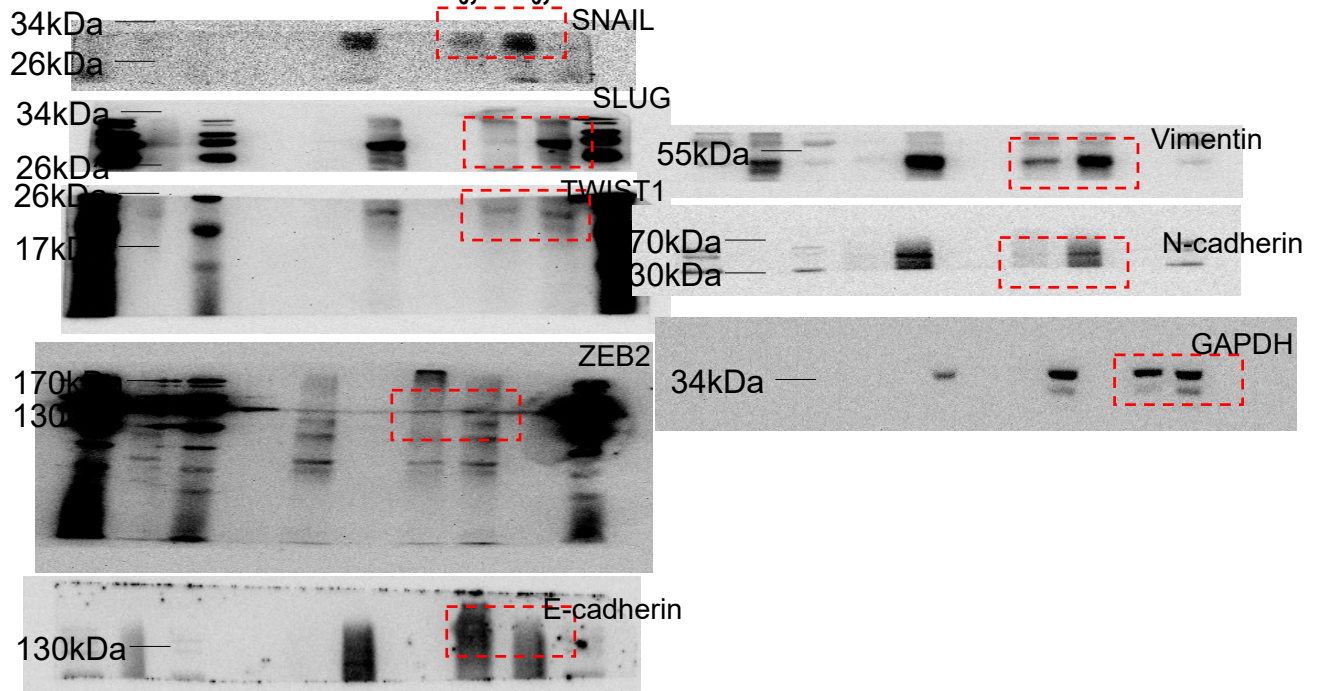

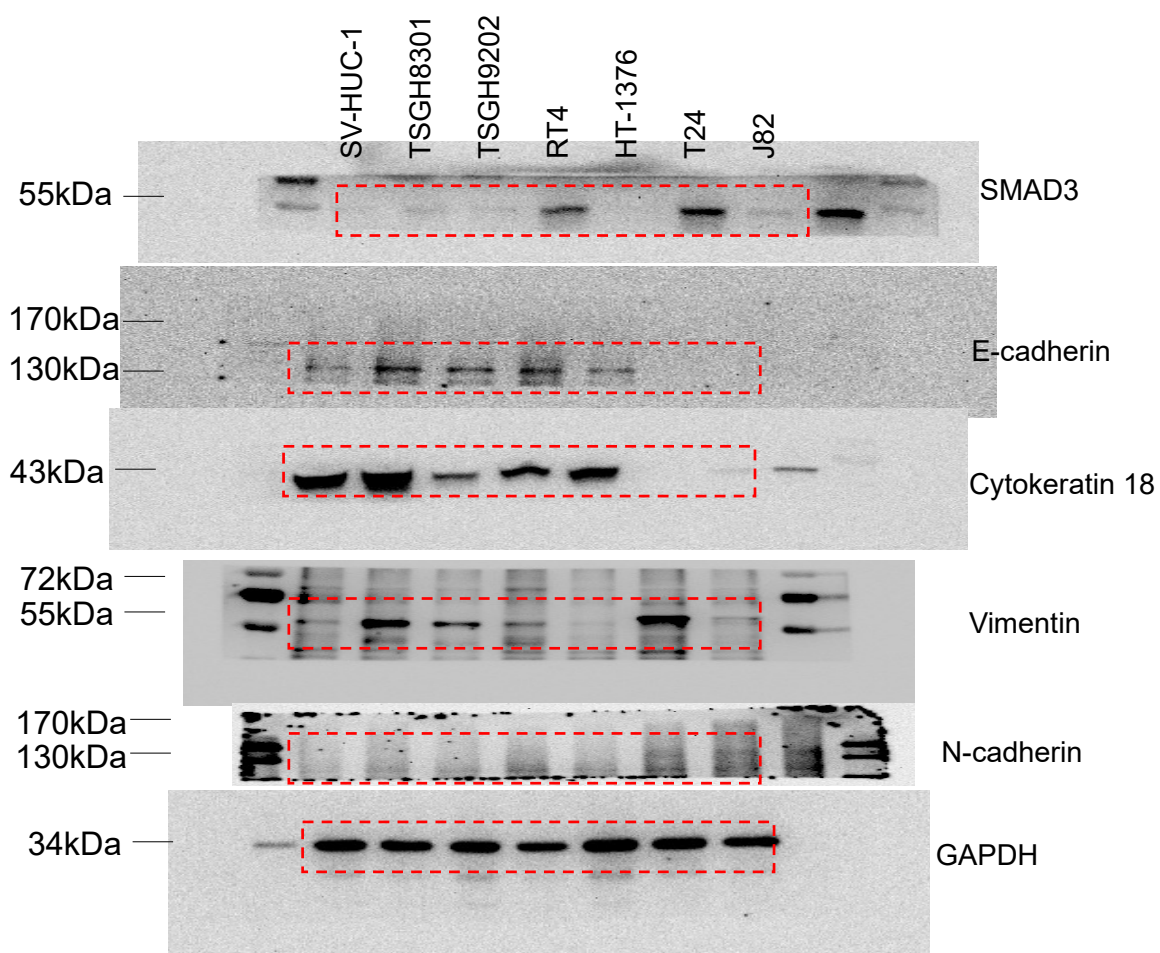

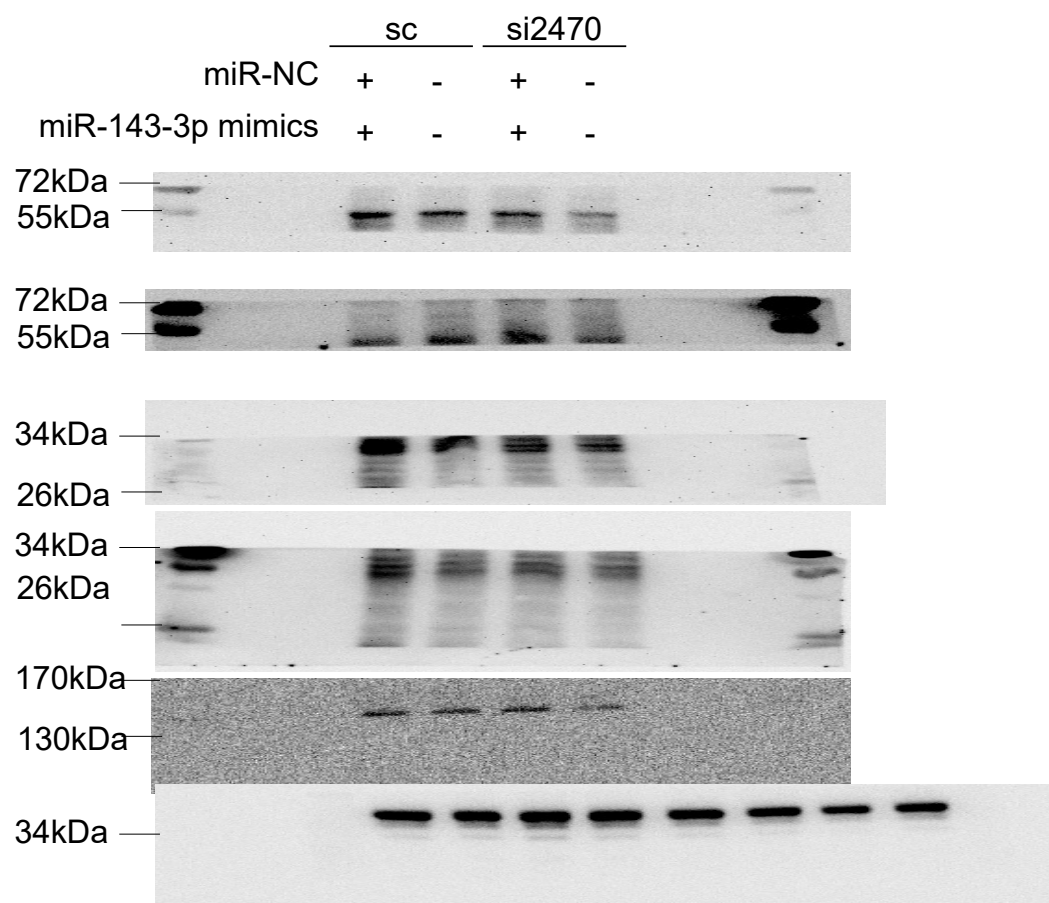



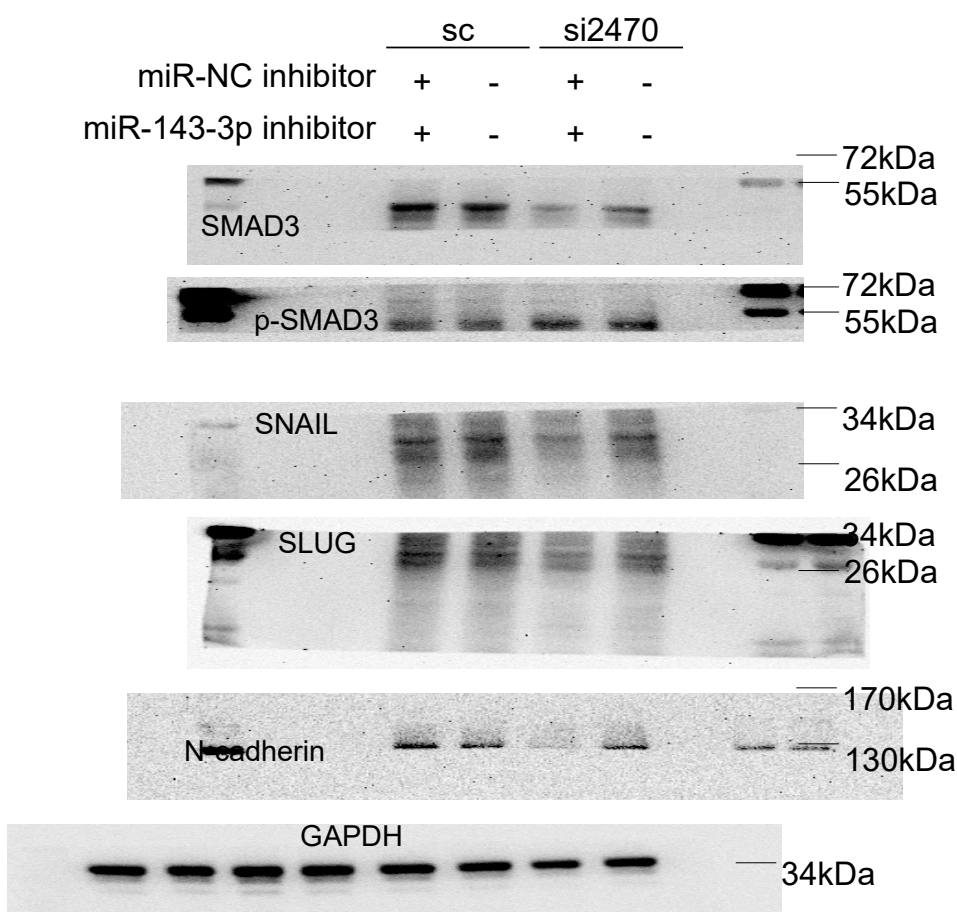

**Supplementary Figure S4: Full Western blot images**

**Supplementary Table S1. Primer list**

|           |                 |                         |
|-----------|-----------------|-------------------------|
| MIR4697HG | Forward (5'-3') | CCACGGTCTCTGCACAAGGG    |
|           | Reverse (5'-3') | TGCATGTGGCCAGAAGTCGG    |
| TRMU      | Forward (5'-3') | GGGGTCTGTACTGCCGACAA    |
|           | Reverse (5'-3') | GCATCCTGGGAAACCTGGCATT  |
| IGFL2-AS1 | Forward (5'-3') | GCCCCAAGGGCTCATTACACA   |
|           | Reverse (5'-3') | TGTGTAAGTAACACGTCCTGGGT |
| LINC01451 | Forward (5'-3') | TGAGCTGTGCATCCCGTGTG    |
|           | Reverse (5'-3') | CGCCACAGTCCGTGTGTGAT    |
| GLIDR     | Forward (5'-3') | CGAATCCACCCATTGCCCCGT   |
|           | Reverse (5'-3') | GAGGCGTCTCTTCCGTGCAG    |
| LOC728673 | Forward (5'-3') | TGACGGGCGAGGGTTACTGT    |
|           | Reverse (5'-3') | CCGCTCAGGCTCAAGAGCAA    |
| LINC01291 | Forward (5'-3') | GTGACCAGCAGCATGTGTTTCCA |
|           | Reverse (5'-3') | CAGGACTCACTGGCAATTCACCT |

|                                   |                 |                           |
|-----------------------------------|-----------------|---------------------------|
| LINC02470                         | Forward (5'-3') | AGCAGACCAACACGCCAGAA      |
|                                   | Reverse (5'-3') | AGAAGAAAAGCAATGCCTCCACA   |
| NOTCH1                            | Forward (5'-3') | GGTGAAGTCTCTGAGGAGATC     |
|                                   | Reverse (5'-3') | GGATTGCAGTCGTCCACGTTGA    |
| NOTCH4                            | Forward (5'-3') | TTCCACTGTCCTCCTGCCAGAA    |
|                                   | Reverse (5'-3') | TGGCACAGGCTGCCTTGAATC     |
| CTNNB1                            | Forward (5'-3') | CACAAGCAGAGTGCTGAAGGTG    |
|                                   | Reverse (5'-3') | GATTCCTGAGAGTCCAAAGACAG   |
| TCF4                              | Forward (5'-3') | GCCTCTTCACAGTAGTGCCATG    |
|                                   | Reverse (5'-3') | GCTGGTTTGGAGGAAGGATAGC    |
| SMAD2                             | Forward (5'-3') | GGGTTTTGAAGCCGTCTATCAGC   |
|                                   | Reverse (5'-3') | CCAACCACTGTAGAGGTCCATTC   |
| SMAD3                             | Forward (5'-3') | TCACTGGTGCTGGGGTTAGG      |
|                                   | Reverse (5'-3') | GAAGCGAGCGGCGGCAATAA      |
| SMAD4                             | Forward (5'-3') | CTACCAGCACTGCCAACTTTCC    |
|                                   | Reverse (5'-3') | CCTGATGCTATCTGCAACAGTCC   |
| GAPDH                             | Forward (5'-3') | CCTGCCGGTGACTAACCCTG      |
|                                   | Reverse (5'-3') | TCCACCACTGACACGTTGGC      |
| LINC02470-miR-143-<br>3p-fragment | Forward (5'-3') | CTCGTGAGGGTTGGAGATGG      |
|                                   | Reverse (5'-3') | ATTCAGTTCCAGCCTTGTGGA     |
| SMAD3-3'UTR                       | Forward (5'-3') | CACCTTCCAAGGAGCCAACT      |
|                                   | Reverse (5'-3') | CCCTCATGTGTGCTCTTCCT      |
| SNAIL ChIP                        | Forward (5'-3') | CAGGTGACCCGCCTCTTAAC      |
|                                   | Reverse (5'-3') | AGGGTAGCTTCTGGTCCAGT      |
| SLUG ChIP                         | Forward (5'-3') | TGCCACTTCCAAATATAGGCTCTCA |
|                                   | Reverse (5'-3') | CTGGGACAGCTGTGAACAGA      |
